# Supplementary material
Source: Royal Society of Chemistry journal article supplement (doi:10.1039/d6ma00333h)
Supplement: d6ma00333h1.pdf [file d6ma00333h1.pdf]

## SUPPLEMENTARY INFORMATION

### **Evaluation of the influence of various metals in iron-rich acid mine drainage on crystallinity, morphology and textural properties of iron-based MIL-101**

Keaoleboga Mosupi<sup>1,2</sup>, Christophe A. Ndamyabera<sup>1</sup>, Mike Masukume<sup>2</sup>, L. Scott Blankenship<sup>3</sup>, Robert Mokaya<sup>3</sup>, Nicholas M. Musyoka<sup>4\*</sup>, Henrietta W. Langmi<sup>1\*</sup>

<sup>1</sup>*Department of Chemistry, University of Pretoria, Private Bag X20, Hatfield, 0028, South Africa*

<sup>2</sup>*Centre for Nanostructures and Advanced Materials, Council for Scientific and Industrial Research (CSIR), Meiring Naude Road, Pretoria, 0001, South Africa*

<sup>3</sup>*School of Chemistry, University Park, University of Nottingham, Nottingham NG7 2RD, U.K*

<sup>4</sup>*Nottingham Ningbo China Beacons of Excellence Research and Innovation Institute, University of Nottingham Ningbo China, Ningbo 315100, PR China*

*\*Corresponding authors: [henrietta.langmi@up.ac.za](mailto:henrietta.langmi@up.ac.za), [nicholas.musyoka@nottingham.edu.cn](mailto:nicholas.musyoka@nottingham.edu.cn)*

# S1. Linear plots used to determine BET surface area of MIL-101 bimetallic and trimetallic MOFs

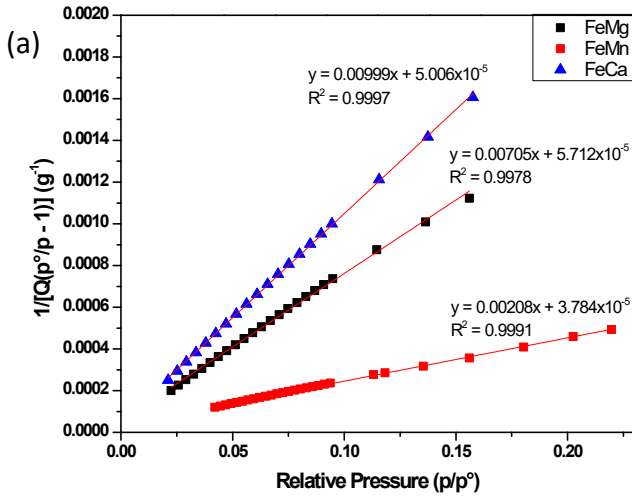

(b)

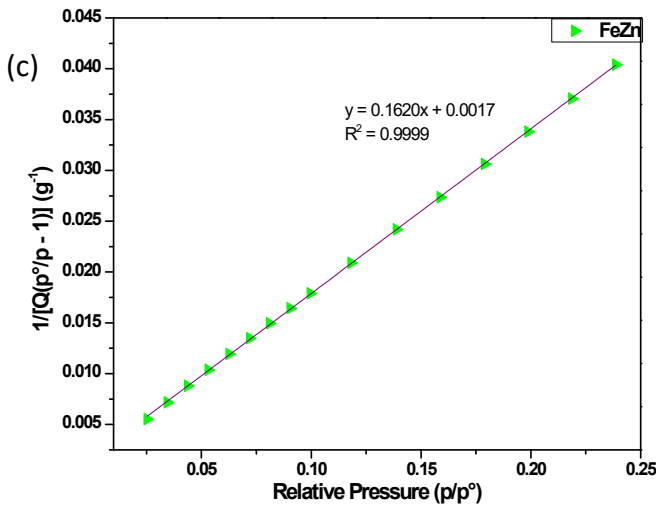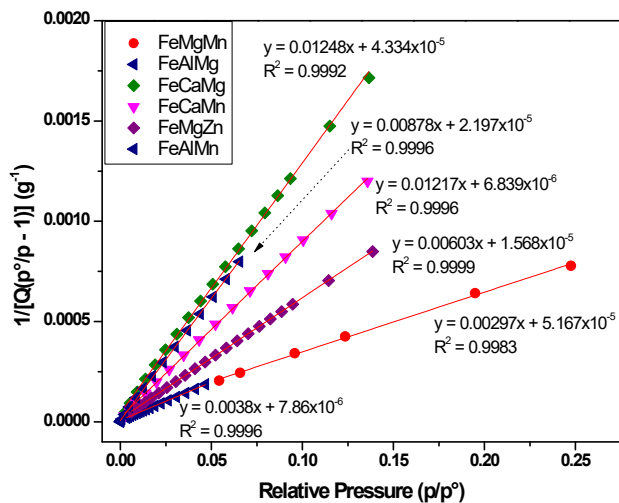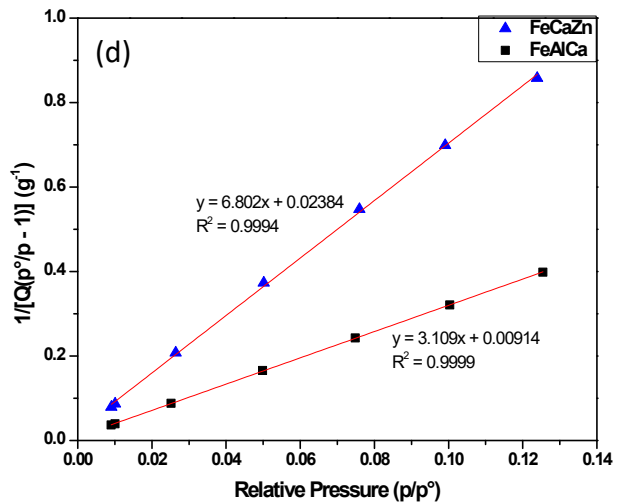

**Figure S1:** Linear BET plot in the selected pressure range (a and b) for bimetallic combinations and (c and d) trimetallic combinations

## S2. Synthesis and characterization of MIL-88B metallic combinations (bimetallic and trimetallic)

All the MIL-88B MOFs were synthesized using AMD-Fe and PET-BDC as precursors. In a typical procedure, 1 g of AMD-Fe was dissolved in 5 mL HCl, followed by the addition of a specific amount of various metal salts to make bimetallic and trimetallic combinations as outlined in Table 1. In a separate beaker, 1 g of PET-BDC was dissolved in 50 mL DMF and 5 mL CH<sub>3</sub>COOH. The two solutions were transferred into a Teflon-lined autoclave, placed in a conventional oven and heated at 110 °C for 20 h. The red precipitate formed was then separated from the solvent via centrifugation, followed by washing with DMF and hot ethanol twice, respectively. The product was then dried at 60 °C under vacuum overnight.

### S2.1. Powder X-ray diffraction (PXRD)

The PXRD patterns show the majority of samples displaying sharp peaks at 2θ of 8.5° and 10°, which are characteristic of MIL-88B.

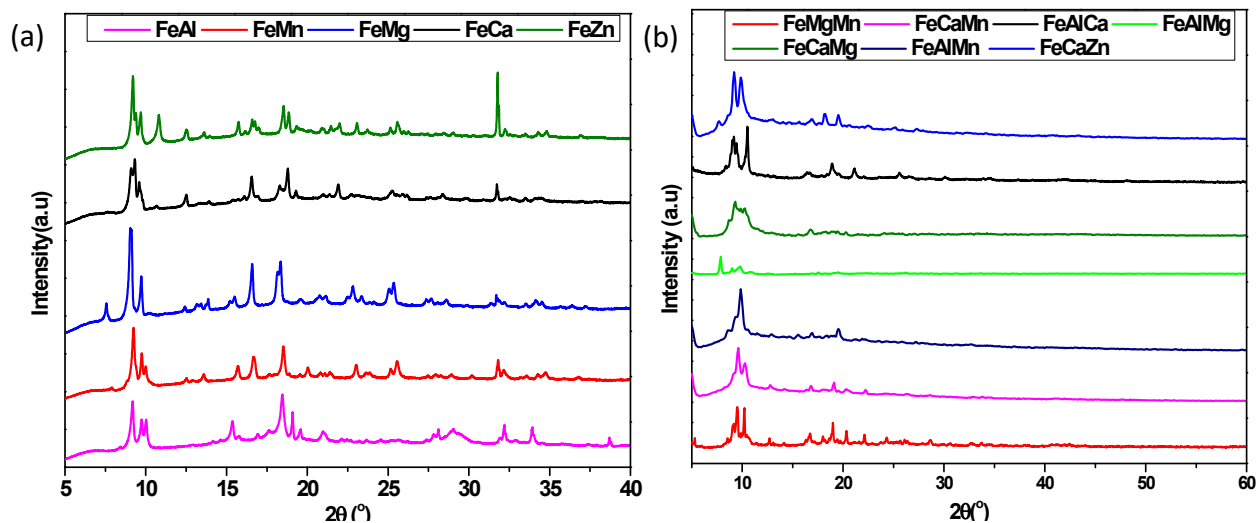

**Figure S2:** Powder X-ray diffraction patterns for MIL-88B synthesized from (a) bimetallic and (b) trimetallic combinations

Both bimetallic and trimetallic combinations displayed major bands at 1390 and 1597  $\text{cm}^{-1}$  are attributed to  $\nu_{\text{as}}(\text{COO})$  and  $\nu_{\text{s}}(\text{COO})$  vibration bands, which are characteristic absorption bands of carboxylate. The vibrational band at 1659  $\text{cm}^{-1}$  is assigned to C=O stretching. The weak bands at 1050 and 750  $\text{cm}^{-1}$  are assigned to C-H bending vibrations of the benzene ring. The coordination of the carboxylate to the metal cluster (Fe-O) is confirmed by the absorption band at 550  $\text{cm}^{-1}$ .

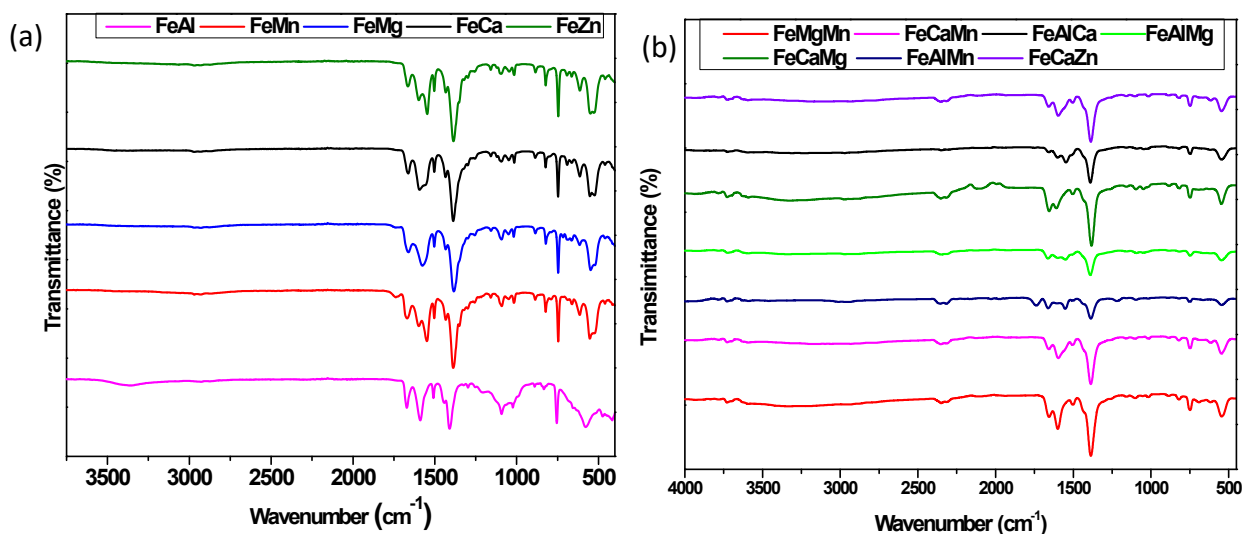

**Figure S3:** Fourier transform infrared spectroscopy patterns for MIL-88B synthesized from (a) bimetallic and (b) trimetallic combinations

## S2.2. Scanning electron microscopy (SEM)

SEM revealed the trigonal bipyramidal morphology associated with MIL-88B. The particle size of the materials varied, with some bulge crystals with mixed octahedral phases associated with MIL-101 and elongated spindle-like crystals.

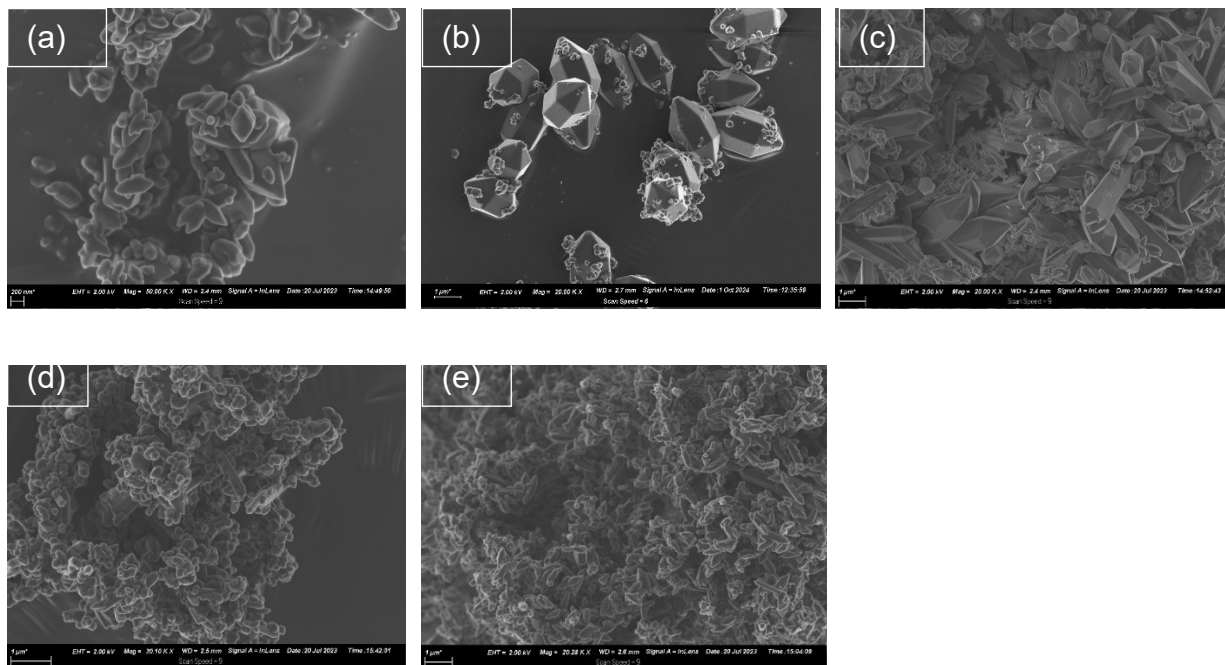

**Figure S4:** SEM images of MIL-88B synthesized from bimetallic combinations: (a) FeAl (b) FeMn (c) FeMg (d) FeCa and (e) FeZn

The trigonal bipyramidal morphology is visible for all samples. There is presence of octahedral morphology and rod-like materials intertwined with MIL-88B crystals.

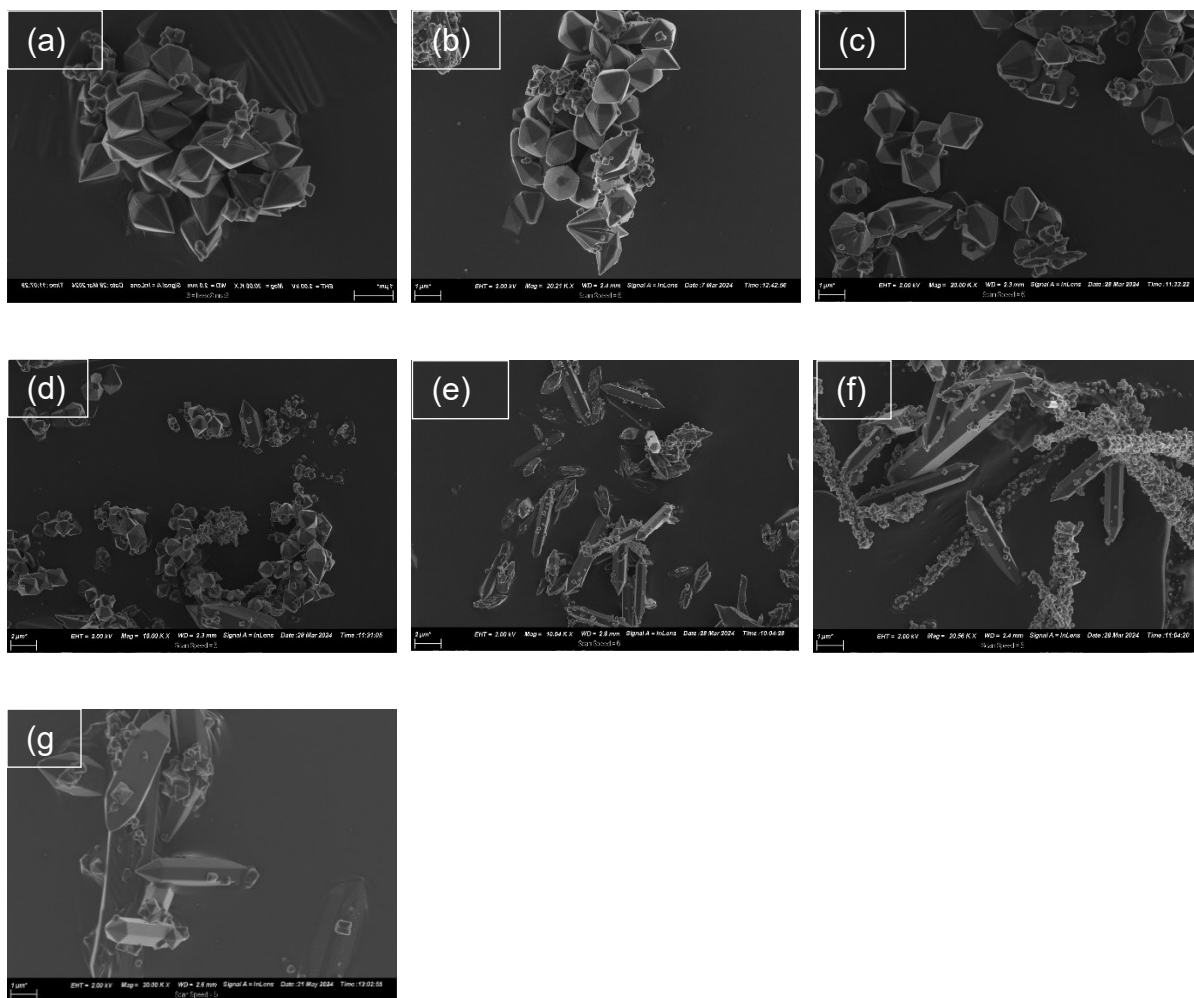

**Figure S5:** SEM images of MIL-88B synthesized from trimetallic combinations: (a) FeMgMn, (b) FeAlMg, (c) FeAlCa, (d) FeMgZn, (e) FeCaMn, (f) FeAlMn, (g) FeCaZn and (h) FeCaMg

### S2.3. Thermogravimetric analysis (TGA)

**Fig. S6a** and **b** show the TGA profiles of FeM-MIL-88B and FeM<sub>1</sub>M<sub>2</sub>-MIL-88B samples, respectively. The plots display a two-step mass loss which is commonly associated with iron-

based MOF structures. The initial mass loss (5 - 30 %) at temperatures below 150 °C is attributed to loss of moisture and/or solvents molecules trapped within the cavities and/or interacting with open metal sites. The carboxylate ligand is thermally stable up to 400 °C for all samples. The remaining mass for all samples was almost identical, ranging between 25 % - 30%, which is usually observed for Fe-MOFs.

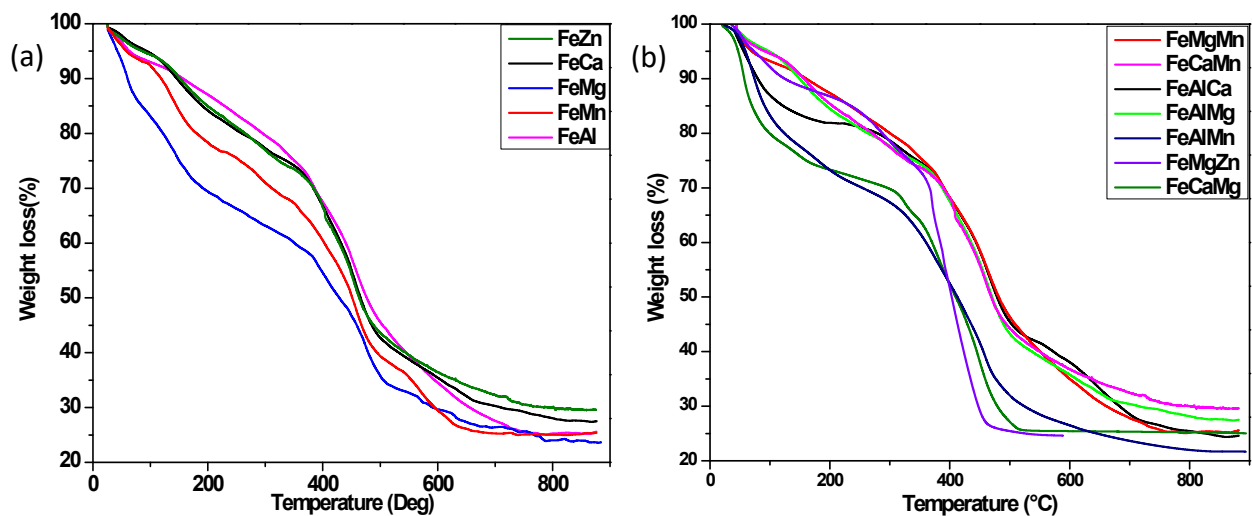

**Figure S6:** TGA profiles of MIL-88B synthesized from (a) bimetallic and (b) trimetallic combinations

#### S2.4. N<sub>2</sub> isotherms and pore size distribution

**Figure S7a and b** shows isotherms of bimetallic and trimetallic MOF samples obtained using N<sub>2</sub> at 77 K. The samples exhibited a combination of Type I(b) and Type IV (a) which is typical for micro and narrow mesoporous materials. The pore size distribution (**S7c and d**) confirms that materials are made of micropores (<2 nm) and narrow mesopores (<3.5 nm). FeZn-MIL-101 samples had large mesopores (>20 nm).

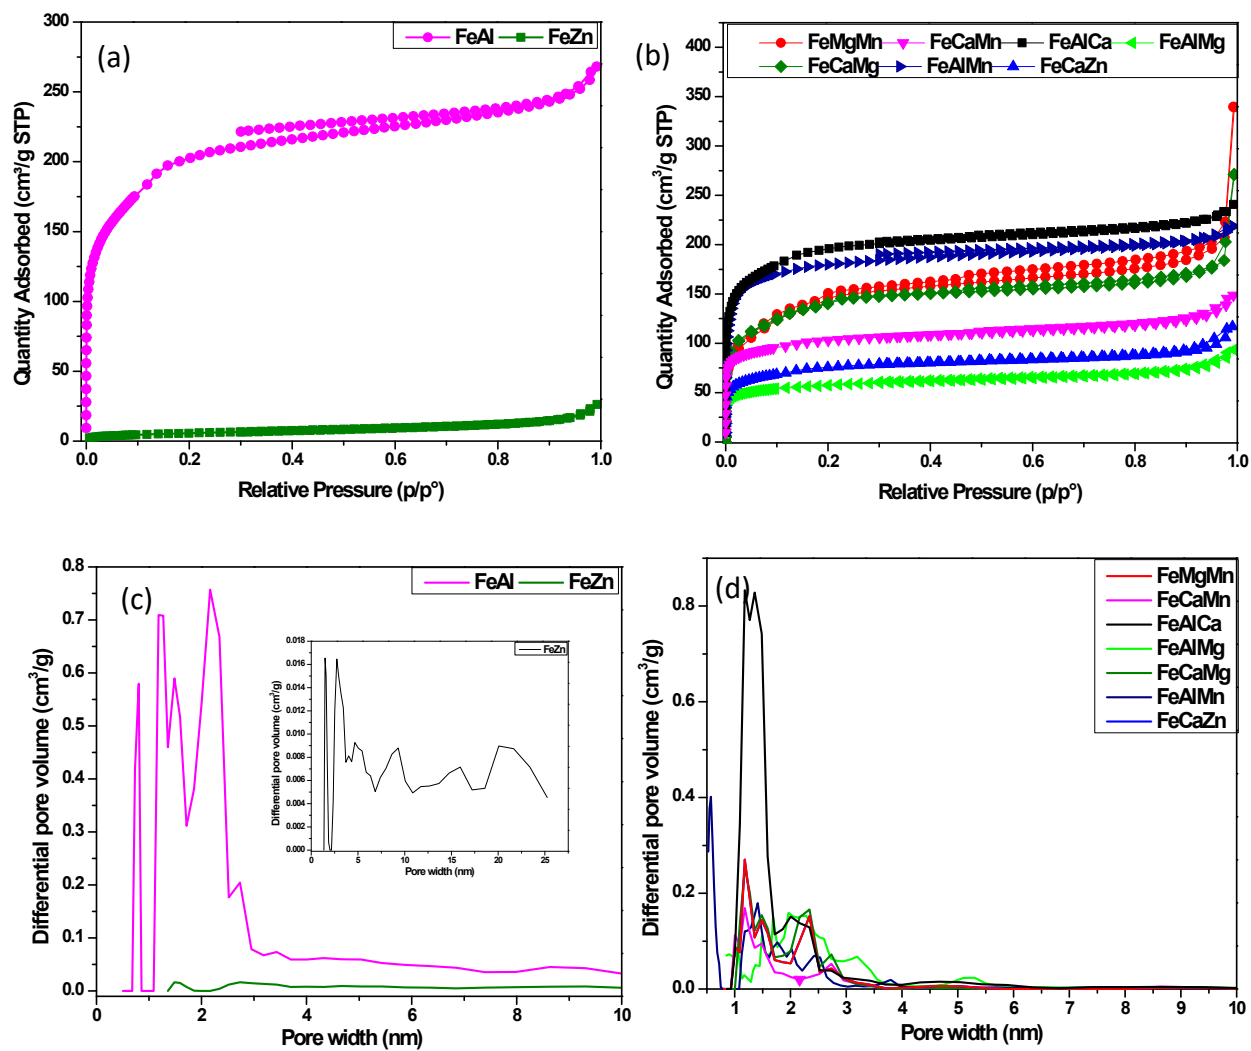

**Figure S7:**  $N_2$  sorption isotherms for MIL-88B synthesized from (a) bimetallic and (b) trimetallic combinations; and pore size distribution for MIL-88B synthesized from (c) bimetallic and (d) trimetallic combinations

**Table S1:** Textural properties of the prepared MIL-88B samples from bimetallic and trimetallic combinations

| Sample label | BET (m <sup>2</sup> /g) | Pore volume (cm <sup>3</sup> /g) | Average pore Size (nm) | H <sub>2</sub> uptake at 77 K, 1 bar (wt%) |
|--------------|-------------------------|----------------------------------|------------------------|--------------------------------------------|
| FeAl         | 744                     | 0.32                             | 1.36                   | 1.34                                       |
| FeZn         | 134                     | 0.22                             | 15                     | 0.40                                       |
| FeMgM        | 525                     | 0.31                             | 1.62                   | 0.47                                       |
| FeMgZn       | 215                     | 0.13                             | 2.20                   | 0.61                                       |
| FeCaZn       | 510                     | 0.30                             | 1.46                   | 0.67                                       |
| FeAlMg       | 501                     | 0.27                             | 1.62                   | 0.50                                       |
| FeCaMn       | 381                     | 0.2                              | 2.1                    | 0.71                                       |
| FeAlCa       | 716                     | 0.35                             | 1.9                    | 0.99                                       |
| FeAlMn       | 684                     | 0.32                             | 1.88                   | 1.05                                       |

### S2.5. Hydrogen adsorption

**Fig. S8a and b** shows H<sub>2</sub> adsorption isotherms obtained at 77 K and 1 bar. Only two of the bimetallic combination MOFs were tested for H<sub>2</sub> adsorption, where FeAl-MIL-88B displayed 1.3 wt% H<sub>2</sub> which is reasonable for the available surface area. Due to low surface area and pore volume, FeZn-MIL-88B performed poorly at 0.4 wt% H<sub>2</sub>. For trimetallic combinations, the best performing samples are FeAlCa-MIL-88B and FeAlMn-MIL-88B with H<sub>2</sub> adsorption of 1.05 and 0.99 wt%, respectively. **Table S1** shows H<sub>2</sub> adsorption of the other trimetallic combinations.

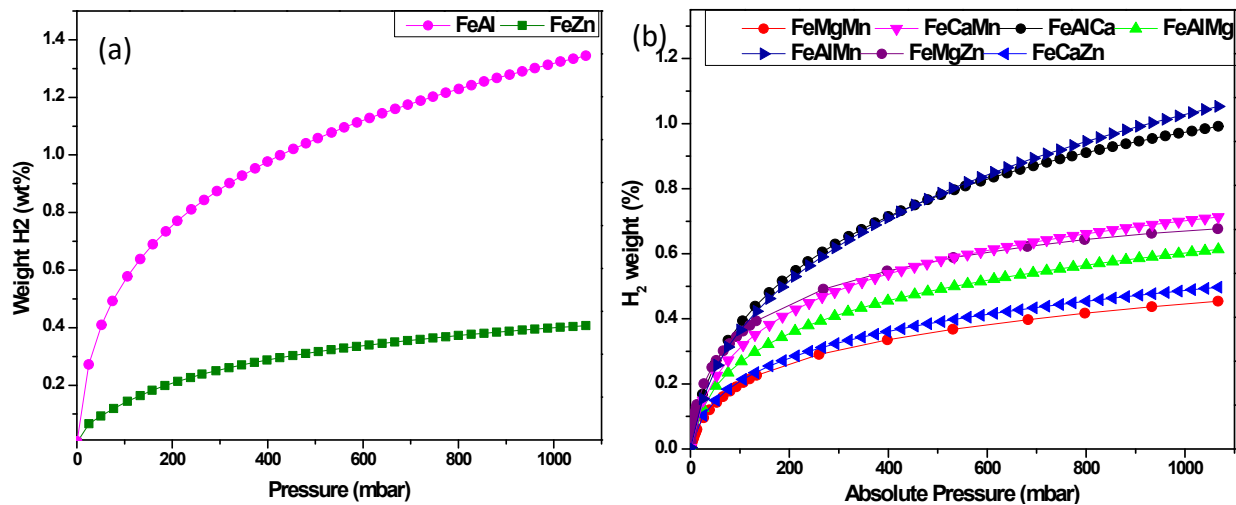

**Figure S8:** (a) and (b) Hydrogen uptake for MIL-88B synthesized from bimetallic and trimetallic combinations 77 K at 1 bar
